# Supplementary material
Source: PubMed Central journal article supplement (PMC3974274)
Supplement: NIHMS508891-supplement-2_si_002.pdf [file NIHMS508891-supplement-2_si_002.pdf]

# Structural, Spectroscopic, and Computational Characterization of the Azide Adduct of Fe<sup>III</sup>(2,6-diacetylpyridinebis(semioxamazide)), a Functional Analogue of Iron Superoxide Dismutase

*Craig T. Gutman, Iliia A. Guzei, and Thomas C. Brunold\**

## Supporting Information.

Figure S1: Variable temperature Abs and MCD spectra of frozen solution Na[Fe<sup>III</sup>(dapsox)(N<sub>3</sub>)<sub>2</sub>]

Figure S2: Variable temperature MCD spectra of solid state (Na[Fe<sup>III</sup>(dapsox)(N<sub>3</sub>)<sub>2</sub>] · DMF)<sub>2</sub>

Figure S3: Frozen-solution rR spectra of **1** obtained with 19 460 cm<sup>-1</sup> (514 nm) laser excitation

Figure S4: Frozen-solution rR spectra of **1** obtained with 21 830 cm<sup>-1</sup> (458 nm) laser excitation

Figure S5: Solid state rR spectra of **2** obtained with 20 490 cm<sup>-1</sup> (488 nm) laser excitation

Table S1: Cartesian coordinates (Å) of **1<sub>opt</sub>**

Table S2: Cartesian coordinates (Å) of **1<sub>xtal</sub>**

Table S3: Cartesian coordinates (Å) of **1<sub>opt</sub> · H<sub>2</sub>O**

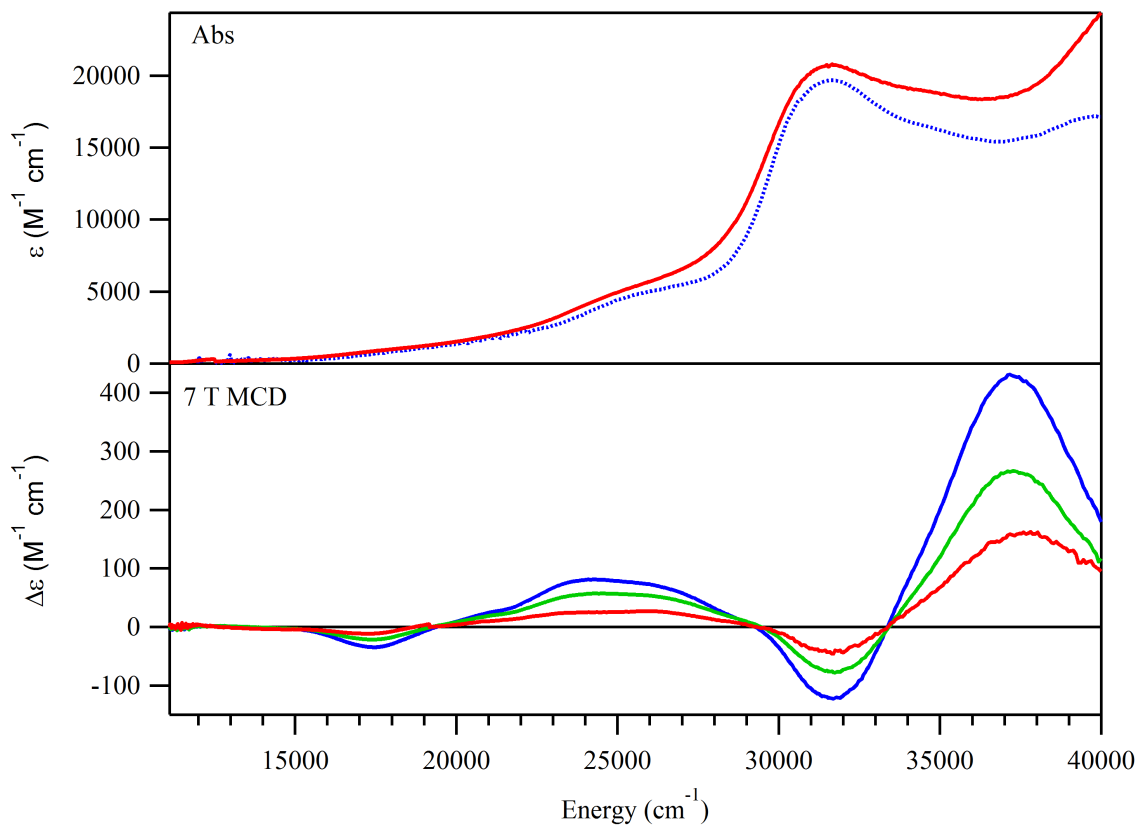

Figure S1: RT (red) and 4.5 K (blue, dotted) Abs (top) and variable temperature (4.5 [blue], 15 [green], and 25 K [red]) MCD (bottom) spectra of frozen solution  $\text{Na}[\text{Fe}^{\text{III}}(\text{dapsox})(\text{N}_3)_2]$ . All MCD features decrease with increasing temperature, consistent with their expected C-term behavior.

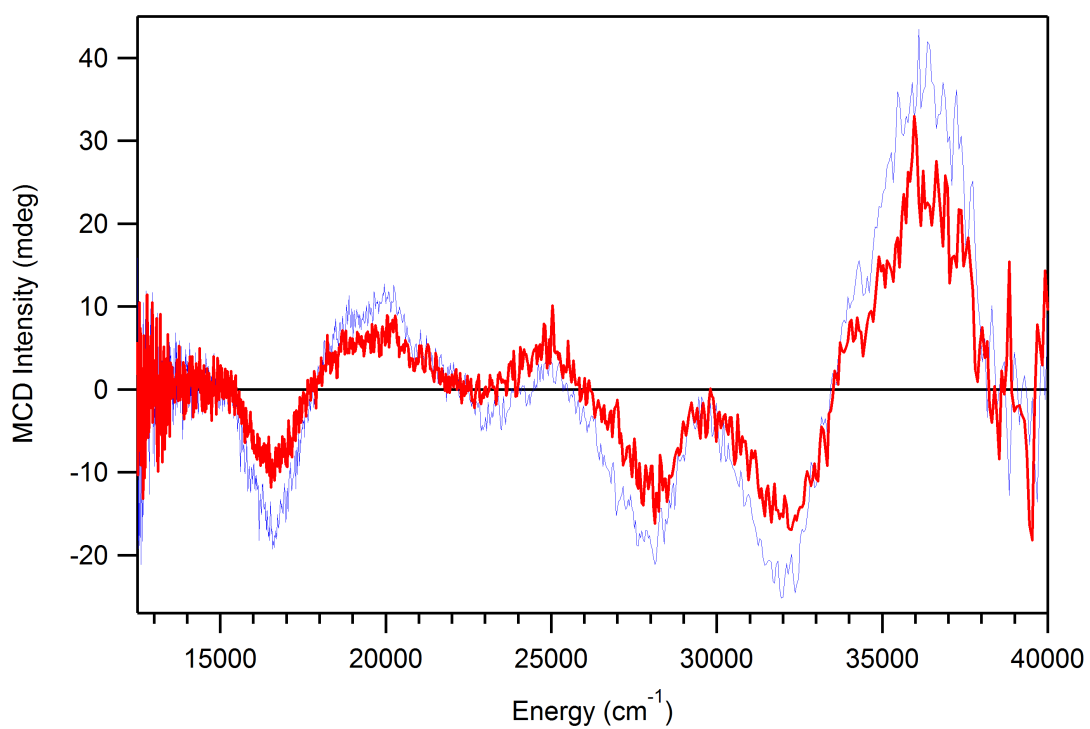

Figure S2: 4.5 (blue, dotted) and 15 K (red) 7 T MCD spectra of a solid state mull of  $(\text{Na}[\text{Fe}^{\text{III}}(\text{dapsox})(\text{N}_3)_2] \cdot \text{DMF})_2$  in polydimethylsiloxane.

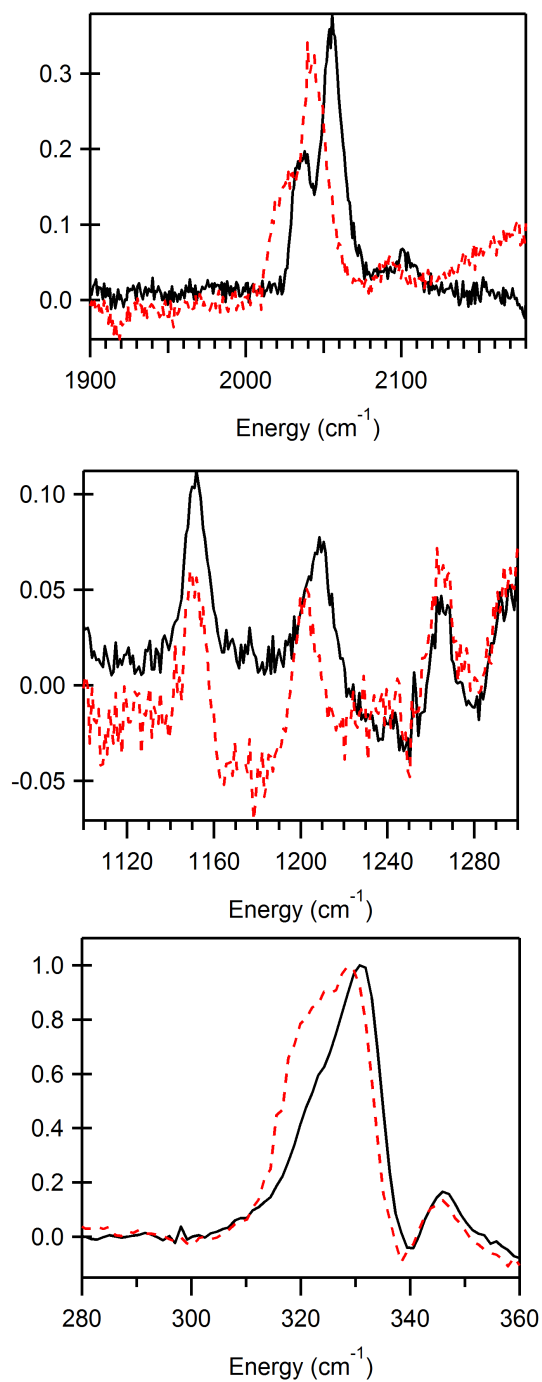

Figure S3: Frozen-solution rR spectra of **1** at 77 K obtained with 19 460 cm<sup>-1</sup> (514 nm) laser excitation. Spectra of **1** synthesized with natural abundance azide are shown in black while spectra of **1** prepared with <sup>15</sup>N terminally labeled azide are shown as dashed, red lines. Selected regions are shown to highlight the four isotopically sensitive features arising from the  $\nu_{as}(\text{N}_3^-)$  stretches (top), the  $\nu_s(\text{N}_3^-)$  stretch (middle), and the  $\nu(\text{Fe} - \text{N}_3)$  stretch (bottom). For ease of comparison the spectra have been normalized using the  $\nu(\text{Fe} - \text{N}_3)$  peak.

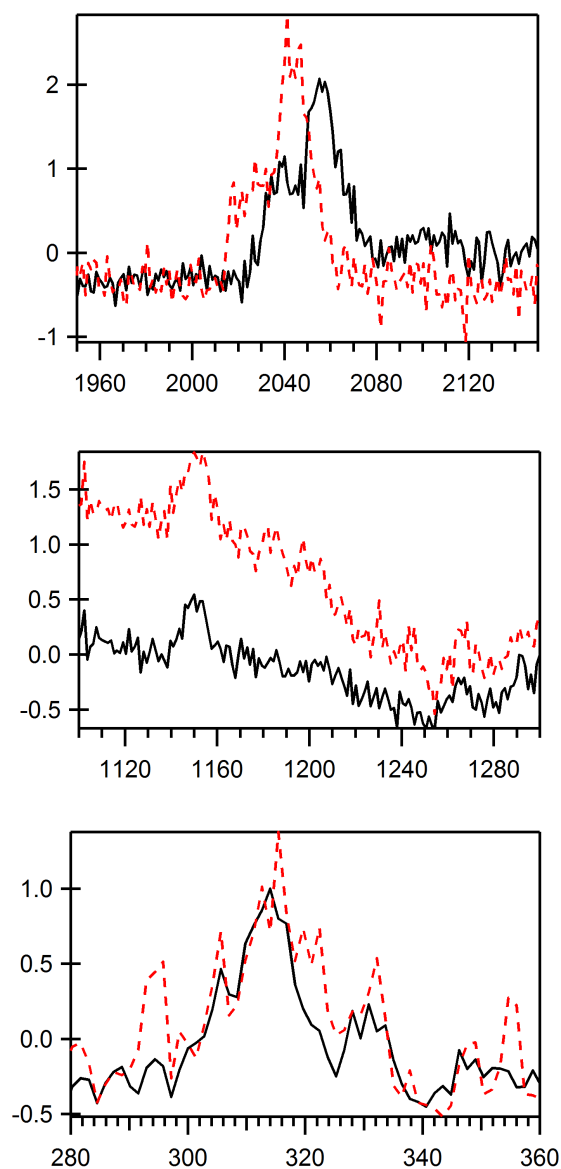

Figure S4: Frozen-solution rR spectra of **1** at 77 K obtained with  $21\,830\text{ cm}^{-1}$  (458 nm) laser excitation. Spectra of **1** synthesized with natural abundance azide are shown in black while spectra of **1** prepared with  $^{15}\text{N}$  terminally labeled azide are shown as dashed, red lines. Selected regions are shown to highlight the four isotopically sensitive features arising from the  $\nu_{as}(\text{N}_3^-)$  stretches (top), the  $\nu_s(\text{N}_3^-)$  stretch (middle), and the  $\nu(\text{Fe} - \text{N}_3)$  stretch (bottom). For ease of comparison the spectra have been normalized using the  $\nu(\text{Fe} - \text{N}_3)$  peak.

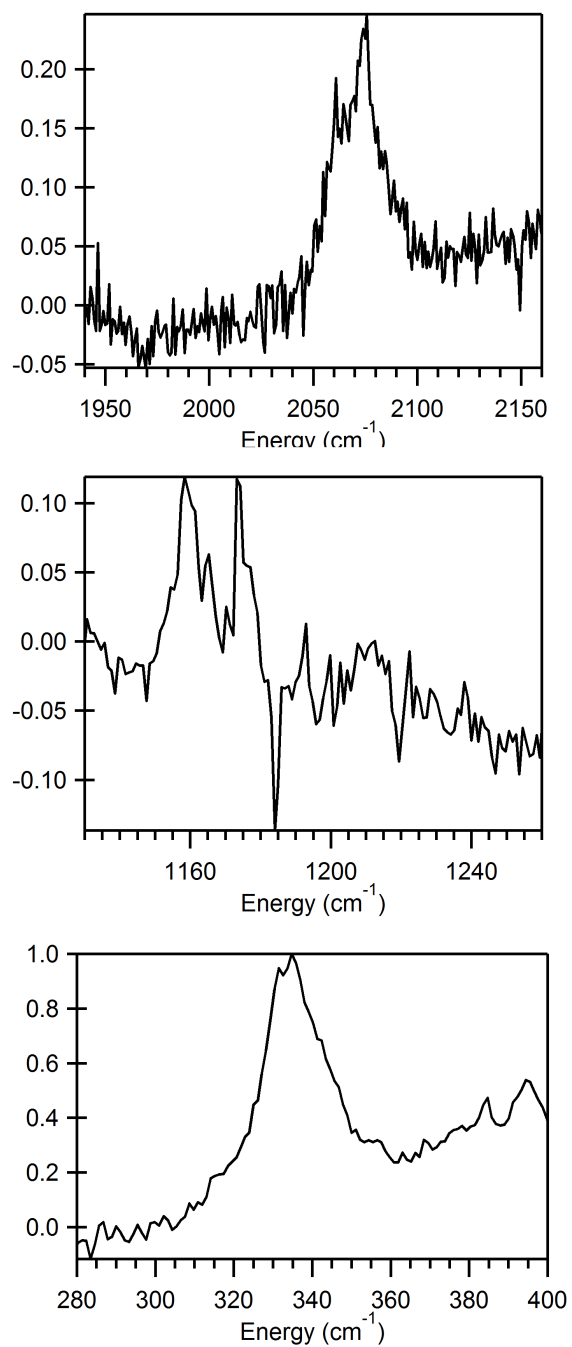

Figure S5: Solid state rR spectra of **2** at 77 K obtained with 20 490 cm<sup>-1</sup> (488 nm) laser excitation. Selected regions are shown to highlight the four isotopically sensitive features arising from the  $\nu_{as}(\text{N}_3^-)$  stretches (top), the  $\nu_s(\text{N}_3^-)$  stretch (middle), and the  $\nu(\text{Fe} - \text{N}_3)$  stretch (bottom).

Table S1: Cartesian coordinates ( $\text{\AA}$ ) of  $\mathbf{l}_{\text{opt}}$ 

| Atom | x      | y     | z      | Atom | x      | y      | z      |
|------|--------|-------|--------|------|--------|--------|--------|
| C    | -1.734 | 3.933 | 3.361  | C    | 5.244  | 1.787  | 1.369  |
| N    | -2.715 | 4.179 | 2.444  | N    | 3.043  | 5.934  | 0.244  |
| O    | 0.577  | 3.252 | 3.451  | C    | 6.681  | 1.350  | 1.321  |
| C    | -0.399 | 3.514 | 2.712  | N    | 1.842  | 0.720  | 2.364  |
| N    | -0.411 | 3.469 | 1.367  | C    | 4.283  | 2.201  | 4.628  |
| O    | -1.883 | 4.030 | 4.561  | N    | 1.517  | 0.065  | 1.416  |
| C    | 1.002  | 2.998 | -0.366 | C    | 4.819  | 2.091  | 6.070  |
| N    | 0.794  | 3.095 | 0.914  | N    | 1.203  | -0.584 | 0.510  |
| O    | 3.094  | 2.561 | 4.455  | Fe   | 2.397  | 2.683  | 2.456  |
| C    | -0.080 | 3.299 | -1.363 | H    | 2.160  | 2.555  | -2.896 |
| N    | 3.188  | 2.366 | 0.314  | H    | 4.516  | 1.833  | -3.264 |
| O    | 4.153  | 2.375 | 7.044  | H    | 6.015  | 1.455  | -1.292 |
| C    | 2.365  | 2.576 | -0.726 | H    | 7.077  | 1.280  | 2.344  |
| N    | 4.591  | 2.025 | 2.464  | H    | 7.300  | 2.067  | 0.749  |
| C    | 2.823  | 2.389 | -2.046 | H    | 6.785  | 0.362  | 0.832  |
| N    | 5.168  | 1.893 | 3.667  | H    | -3.630 | 4.462  | 2.774  |
| C    | 4.140  | 1.984 | -2.247 | H    | -2.499 | 4.074  | 1.458  |
| N    | 6.106  | 1.639 | 6.129  | H    | -0.467 | 4.319  | -1.195 |
| C    | 4.980  | 1.772 | -1.153 | H    | -0.931 | 2.609  | -1.218 |
| N    | 2.985  | 4.622 | 2.199  | H    | 0.263  | 3.220  | -2.405 |
| C    | 4.460  | 1.977 | 0.138  | H    | 6.550  | 1.551  | 7.035  |
| N    | 3.012  | 5.282 | 1.200  | H    | 6.598  | 1.448  | 5.262  |

Table S2: Cartesian coordinates (Å) of  $\mathbf{1}_{\text{xtal}}$

| Atom | x      | y     | z      | Atom | x      | y      | z      |
|------|--------|-------|--------|------|--------|--------|--------|
| C    | -1.506 | 3.632 | 3.413  | C    | 5.288  | 1.646  | 1.259  |
| N    | -2.476 | 4.206 | 2.715  | N    | 2.991  | 5.667  | 0.271  |
| O    | 0.700  | 2.731 | 3.319  | C    | 6.706  | 1.207  | 1.200  |
| C    | -0.277 | 3.184 | 2.632  | N    | 2.007  | 0.413  | 2.027  |
| N    | -0.312 | 3.337 | 1.332  | C    | 4.247  | 2.052  | 4.465  |
| O    | -1.516 | 3.476 | 4.641  | N    | 0.875  | 0.059  | 1.824  |
| C    | 1.112  | 3.027 | -0.441 | C    | 4.596  | 2.155  | 5.953  |
| N    | 0.919  | 2.950 | 0.831  | N    | -0.195 | -0.313 | 1.617  |
| O    | 3.010  | 2.253 | 4.207  | Fe   | 2.477  | 2.401  | 2.231  |
| C    | 0.067  | 3.484 | -1.406 | H    | 2.407  | 2.830  | -2.877 |
| N    | 3.268  | 2.309 | 0.205  | H    | 4.590  | 2.061  | -3.235 |
| O    | 3.685  | 2.025 | 6.771  | H    | 5.938  | 1.443  | -1.408 |
| C    | 2.475  | 2.627 | -0.835 | H    | 7.018  | 0.987  | 2.103  |
| N    | 4.594  | 1.880 | 2.323  | H    | 7.256  | 1.929  | 0.832  |
| C    | 2.954  | 2.570 | -2.146 | H    | 6.779  | 0.415  | 0.627  |
| N    | 5.187  | 1.802 | 3.588  | H    | -3.194 | 4.508  | 3.125  |
| C    | 4.249  | 2.124 | -2.351 | H    | -2.403 | 4.284  | 1.841  |
| N    | 5.858  | 2.417 | 6.264  | H    | -0.143 | 4.427  | -1.237 |
| C    | 5.055  | 1.766 | -1.273 | H    | -0.743 | 2.944  | -1.291 |
| N    | 2.974  | 4.440 | 2.288  | H    | 0.401  | 3.383  | -2.322 |
| C    | 4.526  | 1.898 | 0.009  | H    | 6.093  | 2.509  | 7.107  |
| N    | 2.986  | 5.069 | 1.257  | H    | 6.461  | 2.497  | 5.628  |



Table S3: Cartesian coordinates (Å) of  $\mathbf{1}_{\text{opt}} \cdot \mathbf{H}_2\mathbf{O}$

| Atom | x      | y      | z      | Atom | x      | y      | z      |
|------|--------|--------|--------|------|--------|--------|--------|
| Fe   | -0.255 | 0.169  | 0.254  | N    | 1.861  | 1.194  | 3.442  |
| C    | -2.587 | 3.897  | 0.554  | C    | 2.330  | -3.655 | -0.002 |
| N    | -2.077 | 5.162  | 0.584  | N    | -0.276 | 0.222  | -1.776 |
| O    | -1.842 | 1.608  | 0.427  | C    | -1.610 | -2.389 | 0.515  |
| C    | -1.498 | 2.813  | 0.428  | N    | 0.520  | 0.690  | -2.541 |
| N    | -0.240 | 3.277  | 0.325  | C    | -2.765 | -3.359 | 0.815  |
| O    | -3.771 | 3.636  | 0.620  | N    | 1.277  | 1.135  | -3.294 |
| C    | 1.890  | 2.479  | 0.102  | H    | -2.717 | 5.944  | 0.659  |
| N    | 0.616  | 2.250  | 0.220  | H    | -1.073 | 5.287  | 0.511  |
| O    | -1.871 | -1.159 | 0.455  | H    | 2.191  | 4.389  | 1.029  |
| C    | 2.439  | 3.876  | 0.082  | H    | 1.960  | 4.455  | -0.727 |
| N    | 2.030  | 0.108  | 0.053  | H    | 3.530  | 3.907  | -0.059 |
| O    | -3.880 | -2.970 | 1.101  | H    | 4.676  | 2.190  | -0.199 |
| C    | 2.713  | 1.264  | -0.004 | H    | 5.859  | 0.003  | -0.371 |
| N    | 0.517  | -1.982 | 0.210  | H    | -3.071 | -5.367 | 1.044  |
| C    | 4.114  | 1.256  | -0.155 | H    | -1.423 | -4.892 | 0.621  |
| N    | -0.403 | -2.946 | 0.360  | H    | 4.542  | -2.125 | -0.266 |
| C    | 4.771  | 0.032  | -0.251 | H    | 1.508  | -4.380 | 0.084  |
| N    | -2.409 | -4.672 | 0.718  | H    | 3.049  | -3.835 | 0.819  |
| C    | 4.043  | -1.158 | -0.193 | H    | 2.865  | -3.834 | -0.954 |
| N    | 0.062  | 0.183  | 2.305  | O    | -2.024 | -1.680 | 3.379  |
| C    | 2.648  | -1.081 | -0.035 | H    | -1.294 | -1.082 | 3.113  |
| N    | 0.981  | 0.699  | 2.881  | H    | -2.734 | -1.462 | 2.749  |
| C    | 1.774  | -2.261 | 0.057  |      |        |        |        |
